# Supplementary material
Source: MDPI journal article supplement (https://www.mdpi.com/2073-4352/13/3/468)
Supplement: s1 [file s1]

# The Co-crystallization of 4-Halophenylboronic Acid with Acyclovir, Caffeine, Nitrofuraz, Theophylline and Proline in Function of Weak Interactions

Ventsislav Dyulgerov<sup>1</sup>, Hristina Sbirkova-Dimitrova<sup>1\*</sup>, Kostadin Iliev<sup>1</sup> and Boris Shivachev<sup>1\*</sup>

<sup>1</sup> Institute of Mineralogy and Crystallography "Acad. Ivan Kostov", Bulgarian Academy of Sciences, Acad. G. Bonchev Str., bl. 107, Sofia 1113, Bulgaria; Ventsislav Dyulgerov: vdyulgerov@imc.bas.bg (V.D.), Kostadin Iliev (K.I.) kostadin.iliev2000@gmail.com;

\* Correspondence: Hristina Sbirkova-Dimitrova (H.S-D.) sbirkova@mail.bg and Boris Shivachev: blshivachev@gmail.com (B.Sh).

## Contents

|                                                                                                                              |   |
|------------------------------------------------------------------------------------------------------------------------------|---|
| Figure S1. Comparison of powder diffractogram and calculated (blue) from single crystal data for 4CIB:Pro co-crystals. ....  | 2 |
| Figure S2. Comparison of powder diffractogram and calculated (blue) from single crystal data for 4CIB:NIT co-crystals .....  | 2 |
| Figure S3. Comparison of powder diffractogram and calculated (blue ) from single crystal data for 4CIB:ACL co-crystals ..... | 3 |
| Figure S4. Comparison of powder diffractogram and calculated (blue ) from single crystal data for 4CIB:TEO co-crystals ..... | 3 |
| Figure S5. Comparison of powder diffractogram and calculated (blue) from single crystal data for 4CIB:CAF co-crystals .....  | 4 |

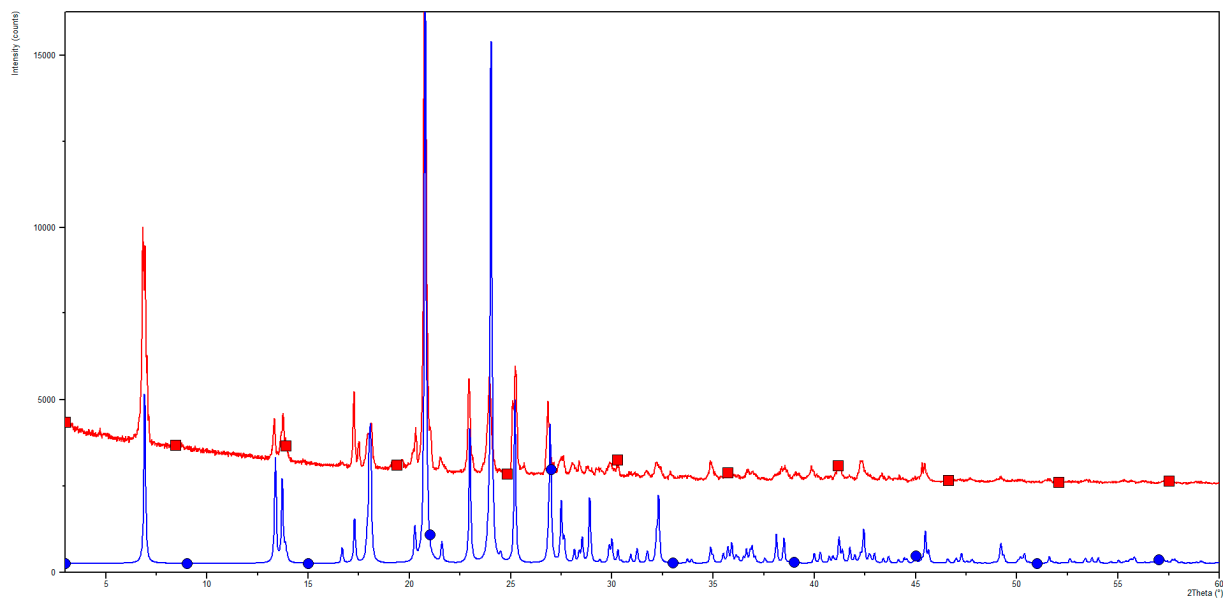

Figure S1. Comparison of powder diffractogram and calculated (blue) from single crystal data for 4CIB:Pro co-crystals.

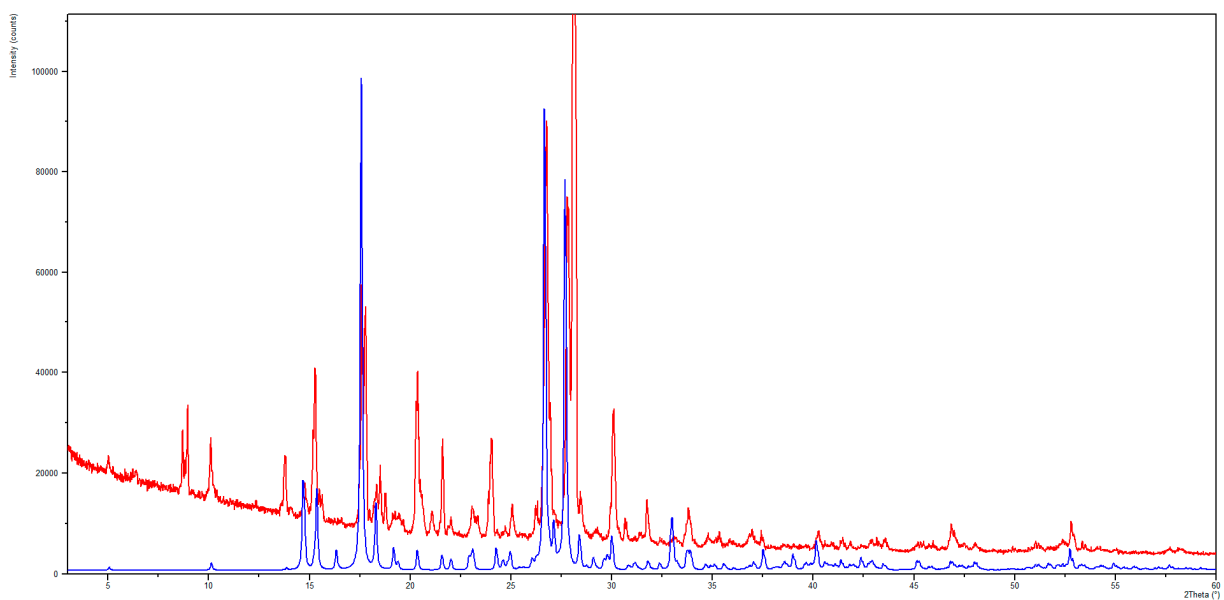

Figure S2. Comparison of powder diffractogram and calculated (blue) from single crystal data for 4CIB:NIT co-crystals

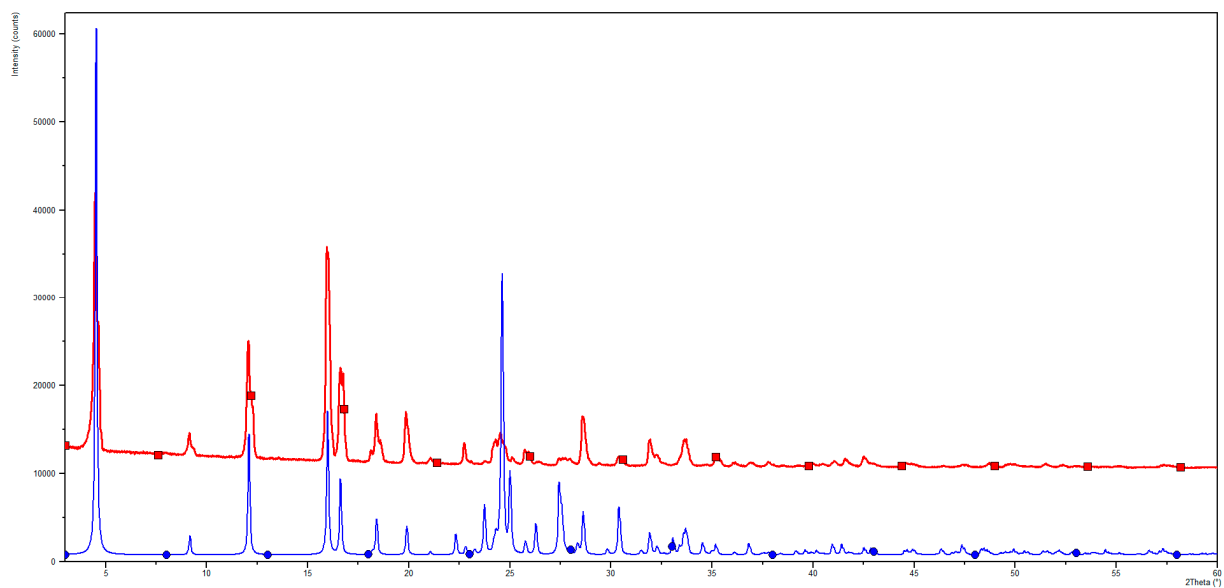

Figure S3. Comparison of powder diffractogram and calculated (blue ) from single crystal data for 4CIB:ACL co-crystals

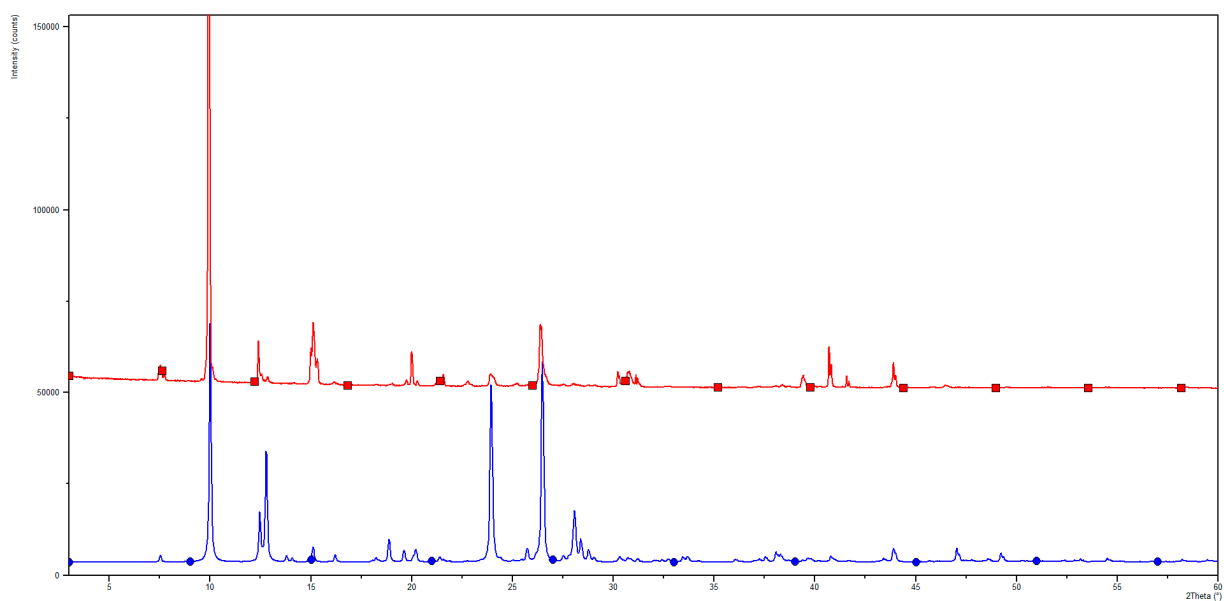

Figure S4. Comparison of powder diffractogram and calculated (blue ) from single crystal data for 4CIB:TEO co-crystals

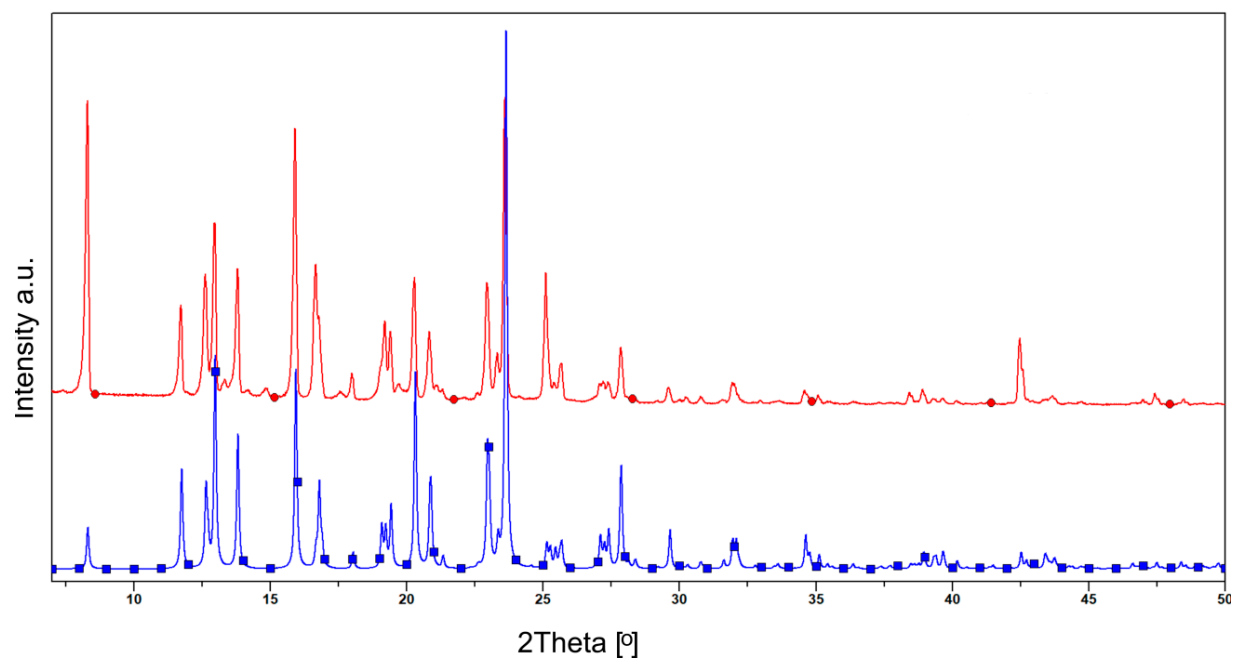

Figure S5. Comparison of powder diffractogram and calculated (blue) from single crystal data for 4CIB:CAF co-crystals
